# Supplementary material
Source: Research Square preprint supplement (doi:10.21203/rs.3.rs-9875544/v1)
Supplement: Supplementary file 1 [file ab28e8a0d992a069e0783de1.docx]

6. **Supplementary**

| **Table S1. Standardized mean differences of baseline variables before and after propensity score matching** | | | |
| --- | --- | --- | --- |
| Variable | Upstaging (matched), mean/prop | Non-upstaging (matched), mean/prop | SMD |
| Age, years | 49.9 | 54.5 | 0.449 |
| BMI | 22.6 | 23.2 | 0.146 |
| Parity | 0.85 | 0.77 | 0.192 |
| Palpable | 0.65 | 0.62 | 0.080 |
| Side (Right) | 0.42 | 0.54 | 0.232 |
| Max SMD |  |  | 0.449 |
| All covariates balanced (SMD < 0.1) |  |  | No |
| SMD indicates absolute standardized mean difference. An SMD < 0.1 is commonly considered indicative of adequate covariate balance. | | | |

| **Figure S1. Covariate balance before and after propensity score matching** |
| --- |
| 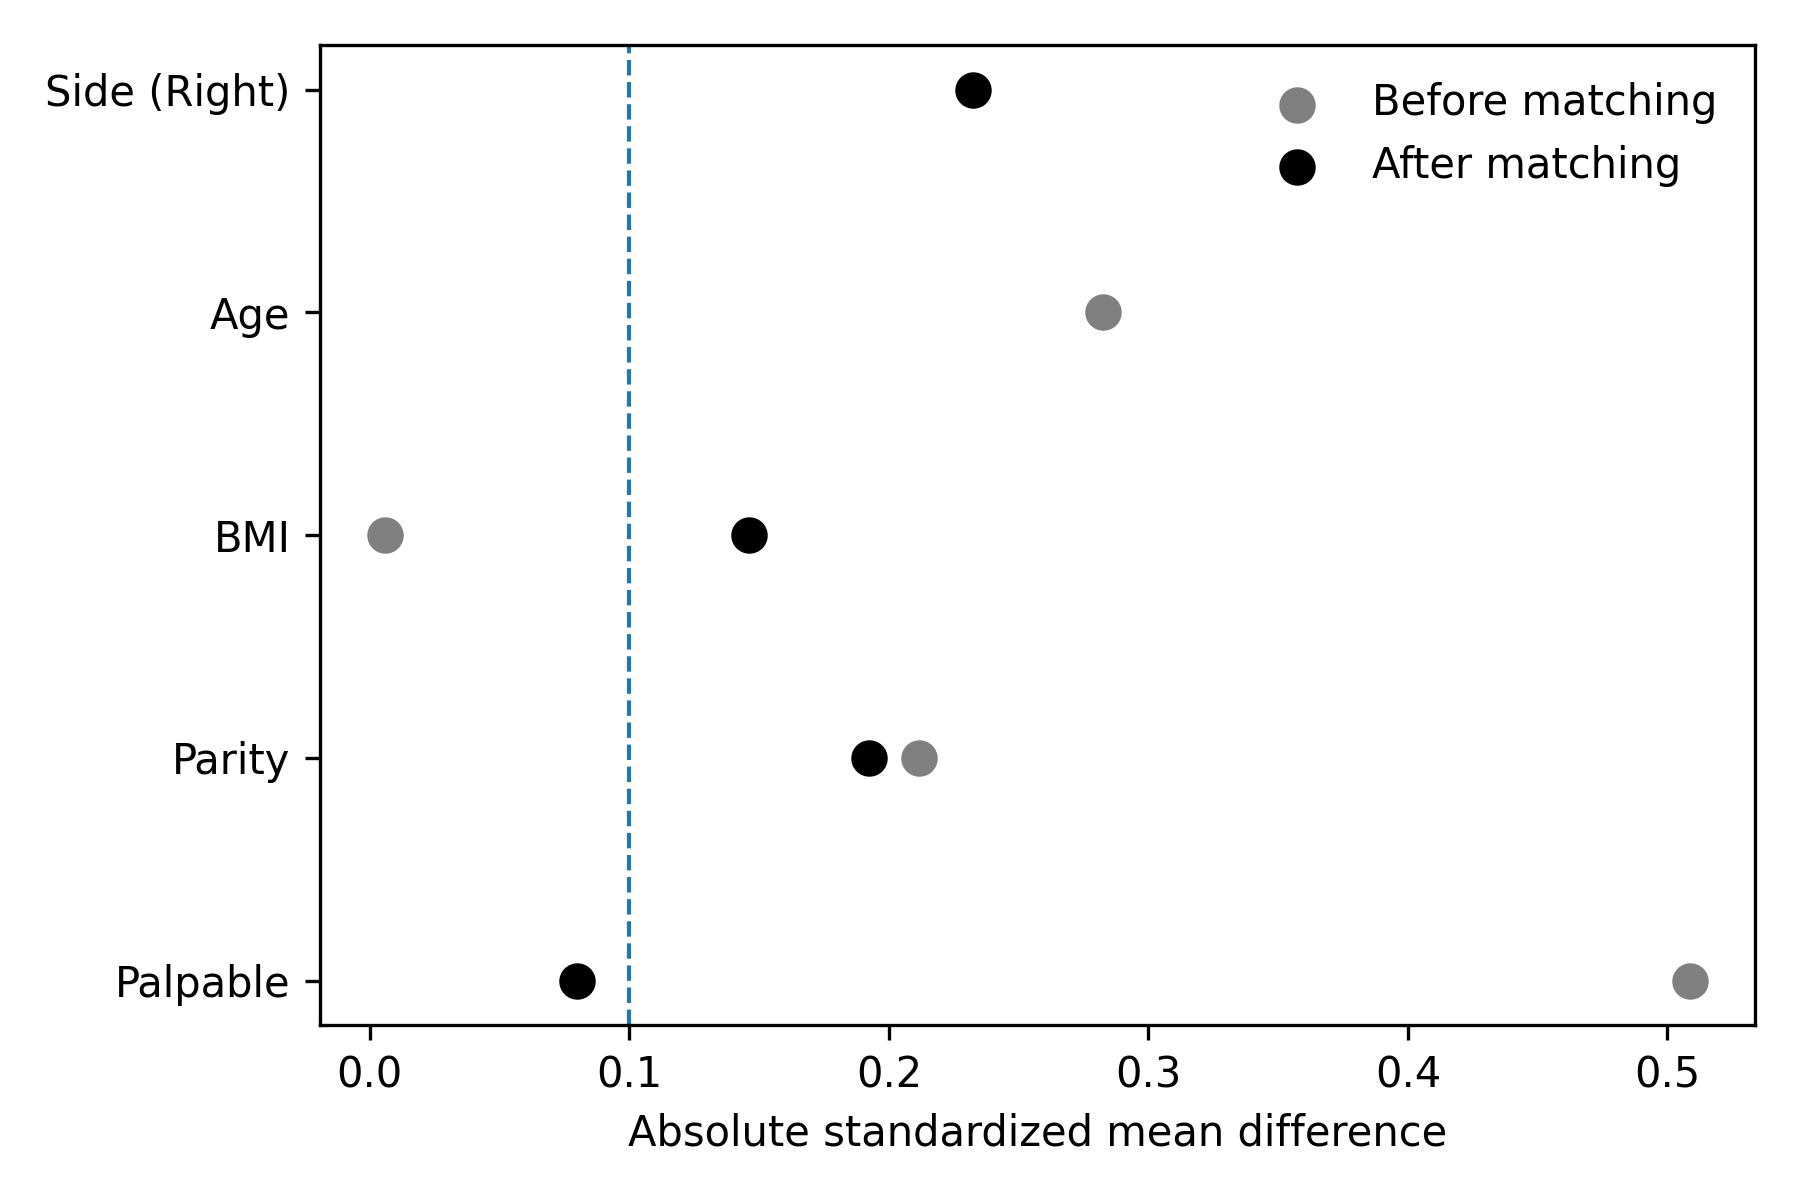 |
| Standardized mean differences (SMDs) of baseline clinical variables before and after propensity score matching between the upstaging and non-upstaging groups. The dashed vertical line indicates the commonly accepted threshold for adequate balance (SMD = 0.1). Despite matching, several variables did not achieve sufficient balance, reflecting limited overlap between the two cohorts. Therefore, propensity score matching was not used as the primary analytical strategy. |

| **Table S2.** **Complete results of late fusion analyses combining clinical variables and imaging-based models for DCIS upstaging prediction.** | | | | | | |
| --- | --- | --- | --- | --- | --- | --- |
| **ID** | **Model group** | **Features included** | **AUC** | **ACC** | **ΔAUC vs Clinical** | **ΔAUC vs Best single-source** |
| C1 | Clinical only | Clinical variables | 0.453 | 0.543 | 0.000 | -0.380 |
| S* | Best single-source (MG_tumor) | MG_tumor | 0.833 | 0.800 | 0.380 | 0.000 |
| MG1 | MG tumor core | MG tumor | 0.833 | 0.800 | 0.380 | 0.000 |
| MG2 | MG peritumoral short | MG peri 2 mm | 0.628 | 0.743 | 0.175 | -0.205 |
| MG3 | MG peritumoral mid | MG peri 5 mm | 0.739 | 0.743 | 0.286 | -0.094 |
| MG4 | MG peritumoral long | MG peri 10 mm | 0.761 | 0.714 | 0.308 | -0.073 |
| US1 | US tumor core | US tumor | 0.675 | 0.743 | 0.222 | -0.158 |
| US2 | US peritumoral short | US peri 2 mm | 0.551 | 0.629 | 0.098 | -0.282 |
| US3 | US peritumoral mid | US peri 5 mm | 0.543 | 0.629 | 0.090 | -0.291 |
| US4 | US peritumoral long | US peri 10 mm | 0.688 | 0.686 | 0.235 | -0.145 |
| US5 | US posterior near | US post 5 mm | 0.739 | 0.743 | 0.286 | -0.094 |
| US6 | US posterior mid | US post 10 mm | 0.603 | 0.743 | 0.150 | -0.231 |
| US7 | US posterior deep | US post 20 mm | 0.611 | 0.743 | 0.158 | -0.222 |
| MGF1 | MG tumor + peri10 | MG tumor + peri10 | 0.821 | 0.771 | 0.368 | -0.013 |
| MGF2 | MG tumor + peri5 | MG tumor + peri5 | 0.812 | 0.771 | 0.359 | -0.021 |
| MGF3 | MG tumor + peri2 | MG tumor + peri2 | 0.829 | 0.829 | 0.376 | -0.004 |
| MGF4 | MG peri5 + peri10 | MG peri5 + peri10 | 0.761 | 0.743 | 0.308 | -0.073 |
| USF1 | US tumor + peri10 | US tumor + peri10 | 0.671 | 0.714 | 0.218 | -0.162 |
| USF2 | US tumor + post5 | US tumor + post5 | 0.752 | 0.743 | 0.299 | -0.081 |
| USF3 | US tumor + post10 | US tumor + post10 | 0.628 | 0.543 | 0.175 | -0.205 |
| USF4 | US peri10 + post5 | US peri10 + post5 | 0.684 | 0.714 | 0.231 | -0.150 |
| CMG1 | Clinical + MG tumor | Clin + MG tumor | 0.833 | 0.829 | 0.380 | 0.000 |
| CMG2 | Clinical + MG peri10 | Clin + MG peri10 | 0.769 | 0.743 | 0.316 | -0.064 |
| CMG3 | Clinical + MG peri5 | Clin + MG peri5 | 0.688 | 0.714 | 0.235 | -0.145 |
| CMG4 | Clinical + MG tumor + peri10 | Clin + MG tumor + peri10 | 0.821 | 0.800 | 0.368 | -0.013 |
| CUS1 | Clinical + US tumor | Clin + US tumor | 0.453 | 0.543 | 0.000 | -0.380 |
| CUS2 | Clinical + US peri10 | Clin + US peri10 | 0.564 | 0.714 | 0.111 | -0.269 |
| CUS3 | Clinical + US post5 | Clin + US post5 | 0.453 | 0.543 | 0.000 | -0.380 |
| CUS4 | Clinical + US tumor + post5 | Clin + US tumor + post5 | 0.453 | 0.543 | 0.000 | -0.380 |
| IM1 | MG tumor + US tumor | MG tumor + US tumor | 0.833 | 0.800 | 0.380 | 0.000 |
| IM2 | MG tumor + US post5 | MG tumor + US post5 | 0.829 | 0.829 | 0.376 | -0.004 |
| IM3 | MG peri10 + US post5 | MG peri10 + US post5 | 0.761 | 0.714 | 0.308 | -0.073 |
| IM4 | MG peri5 + US post5 | MG peri5 + US post5 | 0.744 | 0.714 | 0.291 | -0.090 |
| IM5 | MG tumor + peri10 + US post5 | MG tumor + peri10 + US post5 | 0.816 | 0.771 | 0.363 | -0.017 |
| IM6 | MG tumor + US tumor + post5 | MG tumor + US tumor + post5 | 0.833 | 0.800 | 0.380 | 0.000 |
| IM7 | MG peri10 + US peri10 | MG peri10 + US peri10 | 0.756 | 0.714 | 0.303 | -0.077 |
| IM8 | MG tumor + US peri10 | MG tumor + US peri10 | 0.786 | 0.743 | 0.333 | -0.047 |
| FULL1 | Clin + MG tumor + US tumor | Clin + MG tumor + US tumor | 0.833 | 0.829 | 0.380 | 0.000 |
| FULL2 | Clin + MG tumor + US post5 | Clin + MG tumor + US post5 | 0.829 | 0.829 | 0.376 | -0.004 |
| FULL3 | Clin + MG peri10 + US post5 | Clin + MG peri10 + US post5 | 0.765 | 0.714 | 0.312 | -0.068 |
| FULL4 | Clin + MG tumor + peri10 + US post5 | Clin + MG tumor + peri10 + US post5 | 0.821 | 0.800 | 0.368 | -0.013 |
| FULL5 | Clin + MG tumor + US tumor + post5 | Clin + MG tumor + US tumor + post5 | 0.833 | 0.829 | 0.380 | 0.000 |
| FULL6 | Clin + MG peri10 + US tumor | Clin + MG peri10 + US tumor | 0.765 | 0.714 | 0.312 | -0.068 |
| FULL7 | Clin + MG tumor + US peri10 | Clin + MG tumor + US peri10 | 0.791 | 0.743 | 0.338 | -0.043 |
| FULL8 | Clin + MG tumor + peri10 + US tumor + post5 | Clin + MG tumor + peri10 + US tumor + post5 | 0.816 | 0.800 | 0.363 | -0.017 |
| Comprehensive performance comparison of clinical, imaging, and fusion models for DCIS upstaging prediction. Predictive performance is reported as area under the receiver operating characteristic curve (AUC) and accuracy (ACC). ΔAUC indicates the absolute difference in AUC relative to the clinical-only baseline or the best single-source imaging model. | | | | | | |

| **Table S3. Performance comparison of prior DCIS upstaging prediction models** | | | | | | | | |
| --- | --- | --- | --- | --- | --- | --- | --- | --- |
| **Study (Year)** | **Cohort (N; upstaging %)** | **Endpoint definition** | **Modality** | **Feature type** | **Model** | **Validation** | **AUC** | **ACC** |
| Lee et al. (2022) | 346; 43.3% | Histologic upgrade of DCIS | DCE-MRI | Radiomics | LR/SVM/RF + clinical fusion | internal split | 0.85 | 0.80 |
| Miceli et al. (2023) | 68; 38.0% | Upgrade / invasive component | Ufast DCE-MRI | Ultrafast kinetics | logistic regression (kinetic parameters) | cross-validation | 0.87 | NR |
| Huang et al. (2025) | 87; 23.0% | Upstaging to invasive | MRI | Radiomics | radiomics nomogram | train/test split | 0.81 | 0.76 |
| Alaeikhanehshir et al., (2024) | 161; 25.5% | High-risk DCIS / invasive-related risk | MG | Deep learning | clinical-imaging nomogram | train/val/test | 0.74 | 0.71 |
| Zhang et al., (2025) | 464; 20.7% | Upstaging predictors/nomogram | US/clinical | Clinical + imaging | ROI-specific CNN + LR fusion | training + validation cohort | 0.83 | NR |
| **Present study** | 178; 27% | Biopsy DCIS → surgical invasive | MG/Clinical | Deep learning + fusion | LR fusion | fixed matched split + paired bootstrap | 0.833 | 0.829 |
| Published studies differ in cohort composition, endpoint definition, imaging modality, and validation strategy; therefore, performance metrics are not directly comparable.  AUC = area under the receiver operating characteristic curve; ACC = accuracy; NR = not reported. | | | | | | | | |
